# Supplementary material
Source: PubMed Central journal article supplement (PMC4311176)
Supplement: supp_dju421_jnci_JNCI_14_0917_s01.pdf [file supp_dju421_jnci_JNCI_14_0917_s01.pdf]

## **Supplementary Methods**

### *Phenotypic and Behavioral Risk Factors for Melanoma*

The cohort lacked information on sun sensitivity and sunscreen use, which are important risk factors for melanoma. Therefore, to explore the impact of potential confounding by these unmeasured risk factors, we assessed the cross-sectional associations of coffee intake with phenotypic (sun sensitivity, natural hair color and number of moles  $\geq \frac{1}{4}$  inch in diameter) and behavioral (sunburn in past year, sunscreen use and shade use) melanoma risk factors using data from the 2003-2004 and 2005-2006 US National Health and Nutrition Examination Survey (NHANES). In NHANES, daily coffee intake was assessed using a FFQ that was similar to the one used in NIH-AARP. We restricted our analyses to non-Hispanic white adults, aged 20 to 59 years, with non-missing data for coffee intake, who completed the dermatology questionnaire (n=2,043). Hair color and number of moles at least  $\frac{1}{4}$  in diameter were asked in the more comprehensive 2003-2004 NHANES dermatology questionnaire only. Associations between coffee intake and the following melanoma risk factors were tested in bivariate analyses: number of moles at least  $\frac{1}{4}$  in diameter, natural hair color at age 18, skin reaction to 30 minutes of sun without sun protection after several months of non-exposure, sunscreen use, shade use on sunny days, and history of sunburn in the past year. These analyses used FFQ sample weights and accounted for the complex sampling design of NHANES.

### *Coffee Calibration Sub-study using 24-hour Dietary Recalls*

The analytic cohort included n=1,664 participants who completed two 24-hour dietary recalls on non-consecutive days. Coffee intake from beverages was estimated in grams and values were averaged for the two days of recall. A multivariable linear regression model predicting two-day mean coffee intake in this sub-cohort was fit using dummy variables for nine of the ten original categories of consumption listed on the food frequency questionnaire, with 'none' as the reference group ('less than 1 cup per month', '1-3 cups per month', '1-2 cups per week', '2-4 cups per week', '5-6 cups per week', '1 cup per

day', '2-3 cups per day', '4-5 cups per day' and '6+ cups per day'), as well as the *a priori* selected potential confounders (age, sex, smoking history (detailed), pipe/cigar smoking, education, alcohol drinking, physical activity, BMI and July erythemal UVR). The intercept and beta coefficients from the linear regression model were subsequently used to predict the mean two-day coffee intake for each participant in the analytic cohort (n=447,357). Predicted mean two-day coffee intake was scaled from gram to cups by dividing the gram value by a factor of 236.6. The scaled predicted value was then used in the multivariable (fully)-adjusted Cox proportional hazards regression model to estimate the beta coefficient and standard error separately for a one cup increase in coffee intake with malignant melanoma and melanoma *in situ* with age as the underlying time metric. Next for each of the four coffee intake categories used in the present study (none,  $\leq 1$  cup per day, 2-3 cups per day and  $\geq 4$  cups per day) the mean coffee intake value (cups per day) for the analytic cohort (n=447,357) was calculated (Table 4S). Using 'none' as the reference category, the differences between the mean value for each of the three higher coffee intake categories and the reference category were calculated and hazard ratios were estimated by exponentiating the product of this difference and the appropriate beta coefficient from either the malignant melanoma or the melanoma *in situ* multivariable-adjusted Cox proportional hazards regression model (e.g.  $\text{EXP}((\text{predicted mean coffee intake}_{\geq 4\text{cups/day}} - \text{predicted mean coffee intake}_{\text{none}}) * \beta_{\text{malignant melanoma}})$ ). In addition, 95% CIs were calculated using the standard error (SE) of a given beta coefficient (e.g.  $\text{EXP}((\text{predicted mean coffee intake}_{\geq 4\text{cups/day}} - \text{predicted mean coffee intake}_{\text{none}}) * (\beta_{\text{malignant melanoma}} \pm 1.96 * \text{SE}_{\text{malignant melanoma}}))$ ). Finally, tests for linear trend, comparable to that in our main analysis, were conducted by assigning each of the four coffee intake categories its mean predicted coffee intake value and entering this single variable into separate models for malignant melanoma and melanoma *in situ*.

**Supplementary Table 1. Associations of NIH-AARP Diet and Health Study Characteristics with Malignant Melanoma Adjusted for Age and Sex (n=447,357)**

| <b>Characteristic</b>                        | <b>HR (95% CI)</b>            | <b>P-value§</b> |
|----------------------------------------------|-------------------------------|-----------------|
| <b>Age at entry (years)*</b>                 | 1.03 (1.03-1.04)              | <0.001          |
| <b>BMI (kg/m<sup>2</sup>)</b>                | 1.00 (1.00-1.01)              | 0.31            |
| <b>Sex†</b>                                  |                               |                 |
| Male                                         | Ref.                          | <0.001          |
| Female                                       | 0.52 (0.48-0.57) <sup>b</sup> |                 |
| <b>Cigarette smoking</b>                     |                               |                 |
| Never smoker                                 | Ref.                          | <0.001          |
| Former smoker                                | 0.87 (0.80-0.94)              |                 |
| Current smoker                               | 0.63 (0.54-0.73)              |                 |
| <b>Pipe/Cigar smoking</b>                    |                               |                 |
| Never smoker                                 | Ref.                          | 0.01            |
| Ever smoker                                  | 0.89 (0.81-0.97)              |                 |
| <b>Education</b>                             |                               |                 |
| ≤11 years                                    | Ref.                          |                 |
| High school graduate                         | 1.42 (1.16-1.74)              | <0.001          |
| Some college                                 | 1.62 (1.31-1.99)              |                 |
| College graduate                             | 1.82 (1.50-2.23)              |                 |
| <b>Physical activity</b>                     |                               |                 |
| Never/rarely                                 | Ref.                          |                 |
| 1-3/month                                    | 1.12 (0.97-1.30)              | <0.001          |
| 1-2/week                                     | 1.23 (1.08-1.40)              |                 |
| 3-4/week                                     | 1.34 (1.19-1.51)              |                 |
| 5+/week                                      | 1.31 (1.16-1.49)              |                 |
| <b>Alcohol (drinks/day)</b>                  |                               |                 |
| None                                         | Ref.                          |                 |
| ≤1                                           | 1.12 (1.02-1.23)              | 0.01            |
| >1 and ≤3                                    | 1.24 (1.10-1.39)              |                 |
| >3                                           | 1.11 (0.95-1.29)              |                 |
| <b>July erythemal UVR (J/m<sup>2</sup>)‡</b> |                               |                 |
| ≤186.3                                       | Ref.                          |                 |
| >186.3-236.8                                 | 0.99 (0.89-1.11)              | <0.001          |
| >236.8-253.7                                 | 1.13 (1.02-1.25)              |                 |
| >253.7                                       | 1.19 (1.07-1.31)              |                 |
| <b>Family history of cancer</b>              |                               |                 |
| No                                           | Ref.                          | 0.06            |
| Yes                                          | 1.07 (1.00-1.15)              |                 |

\*Adjusted for sex

†Adjusted for age

‡ July erythemal UVR exposure was calculated as the averaged exposure across all available measured days in the month of July between 1978-1993 and 1996-2005 and categorized as quartiles

§Test for significance is the Wald Chi-Square Test

**Supplementary Table 2. Characteristics, Weighted % (Unweighted n), by Level of Coffee Intake and Age Group among US Adults, NHANES 2003 to 2004**

| Age group                     | Characteristic                      | Coffee Intake     |                   |                   |                  | P-value* |
|-------------------------------|-------------------------------------|-------------------|-------------------|-------------------|------------------|----------|
|                               |                                     | None              | ≤1 cup/day        | 2-3 cup/day       | ≥4 cups/day      |          |
|                               | <b>Overall</b>                      | <b>29.9 (316)</b> | <b>35.0 (372)</b> | <b>25.6 (261)</b> | <b>9.5 (99)</b>  | —        |
| Aged 20-59 years<br>(n=1,048) | Natural hair color at age 18        |                   |                   |                   |                  |          |
|                               | Red/blonde                          | 28.7 (66)         | 37.5 (85)         | 23.3 (54)         | 10.6 (26)        | 0.94     |
|                               | Light/medium brown                  | 30.9 (158)        | 34.3 (178)        | 26.4 (134)        | 8.4 (40)         |          |
|                               | Dark brown/black                    | 29.0 (92)         | 34.4 (109)        | 25.9 (73)         | 10.7 (33)        |          |
|                               | Number of mole ≥ ¼ inch in diameter |                   |                   |                   |                  |          |
|                               | None                                | 31.5 (225)        | 35.8 (249)        | 22.8 (161)        | 9.9 (69)         | 0.18     |
|                               | 1 or 2                              | 26.1 (63)         | 37.5 (85)         | 27.7 (62)         | 8.7 (20)         |          |
|                               | ≥3                                  | 27.4 (28)         | 27.0 (38)         | 36.9 (38)         | 8.7 (10)         |          |
|                               | Family history of melanoma          |                   |                   |                   |                  |          |
|                               | No                                  | 30.0 (249)        | 33.9 (288)        | 26.6 (220)        | 9.4 (82)         | 0.58     |
| Yes                           | 29.4 (67)                           | 39.4 (84)         | 21.6 (41)         | 9.6 (17)          |                  |          |
|                               | <b>Overall</b>                      | <b>19.2 (51)</b>  | <b>31.1 (82)</b>  | <b>38.4 (96)</b>  | <b>11.3 (31)</b> | —        |
| Aged 50-59 years<br>(n=260)   | Natural hair color at age 18        |                   |                   |                   |                  |          |
|                               | Red/blonde                          | 19.0 (7)          | 26.3 (14)         | 41.6 (17)         | 13.1 (8)         | 0.46     |
|                               | Light/medium brown                  | 21.2 (24)         | 34.8 (44)         | 35.3 (50)         | 8.7 (10)         |          |
|                               | Dark brown/black                    | 16.2 (20)         | 28.1 (24)         | 41.3 (29)         | 14.4 (13)        |          |
|                               | Number of mole ≥ ¼ inch in diameter |                   |                   |                   |                  |          |
|                               | None                                | 22.2 (36)         | 33.8 (52)         | 32.3 (52)         | 11.7 (19)        | 0.16     |
|                               | 1 or 2                              | 15.9 (9)          | 31.9 (17)         | 41.8 (24)         | 10.4 (7)         |          |
|                               | ≥3                                  | 13.4 (6)          | 22.1 (13)         | 53.3 (20)         | 11.2 (5)         |          |
|                               | Family history of melanoma          |                   |                   |                   |                  |          |
|                               | No                                  | 19.8 (44)         | 28.4 (67)         | 40.4 (87)         | 11.5 (27)        | 0.19     |
| Yes                           | 15.2 (7)                            | 48.4 (15)         | 26.0 (9)          | 10.4 (4)          |                  |          |

\*Test for categorical variables is the Rao-Scott F adjusted Chi-Square

— Not applicable

**Supplementary Table 3. Characteristics, Weighted % (Unweighted n), by Level of Coffee Intake among US Adults and Age Group, NHANES 2003 to 2006**

| Age group                          | Characteristic                                                           | Coffee Intake     |                   |                   |                  | P-value* |
|------------------------------------|--------------------------------------------------------------------------|-------------------|-------------------|-------------------|------------------|----------|
|                                    |                                                                          | None              | ≤1 cup/day        | 2-3 cup/day       | ≥4 cups/day      |          |
|                                    | <b>Overall</b>                                                           | <b>29.8 (622)</b> | <b>34.6 (728)</b> | <b>26.1 (495)</b> | <b>9.5 (198)</b> | —        |
| Aged 20-59 years<br>(n=2,043)      | Sunburn in past year                                                     |                   |                   |                   |                  |          |
|                                    | Yes                                                                      | 29.8 (354)        | 35.4 (430)        | 26.3 (269)        | 8.5 (102)        |          |
|                                    | No                                                                       | 29.9 (268)        | 33.5 (298)        | 25.8 (226)        | 10.8 (96)        | 0.50     |
|                                    | Sunscreen use†                                                           |                   |                   |                   |                  |          |
|                                    | Always/most of the time                                                  | 28.6 (204)        | 39.0 (267)        | 26.0 (155)        | 6.3 (38)         |          |
|                                    | Sometimes                                                                | 27.8 (144)        | 36.9 (184)        | 26.2 (128)        | 9.1 (46)         |          |
|                                    | Rarely or never                                                          | 31.5 (267)        | 29.7 (273)        | 26.5 (212)        | 12.3 (113)       | 0.01     |
|                                    | Stay in shade on sunny days                                              |                   |                   |                   |                  |          |
|                                    | Always/most of the time or never in sun                                  | 35.3 (191)        | 33.6 (178)        | 21.4 (111)        | 9.8 (48)         |          |
|                                    | Sometimes                                                                | 26.5 (240)        | 36.2 (339)        | 28.1 (220)        | 9.3 (85)         |          |
|                                    | Rarely or never                                                          | 30.2 (191)        | 33.1 (191)        | 27.1 (164)        | 9.6 (65)         | 0.08     |
|                                    | Skin reaction to 30 minutes of sun exposure after prolonged non-exposure |                   |                   |                   |                  |          |
|                                    | Severe sunburn with blistering or peeling                                | 34.4 (139)        | 34.4 (133)        | 20.0 (68)         | 11.2 (39)        |          |
| Mild sunburn with some tanning     | 28.0 (237)                                                               | 35.0 (297)        | 29.1 (221)        | 7.9 (68)          |                  |          |
| Tanning without sunburn or nothing | 29.7 (246)                                                               | 34.2 (298)        | 25.7 (206)        | 10.4 (91)         | 0.11             |          |
| <b>Overall</b>                     | <b>21.2 (113)</b>                                                        | <b>29.9 (157)</b> | <b>34.2 (173)</b> | <b>14.7 (78)</b>  | —                |          |
| Aged 50-59 years<br>(n=521)        | Sunburn in past year                                                     |                   |                   |                   |                  |          |
|                                    | Yes                                                                      | 19.3 (42)         | 30.0 (64)         | 39.4 (69)         | 11.3 (25)        |          |
|                                    | No                                                                       | 22.4 (71)         | 29.9 (93)         | 30.9 (104)        | 16.8 (53)        | 0.08     |
|                                    | Sunscreen use†                                                           |                   |                   |                   |                  |          |
|                                    | Always/most of the time                                                  | 25.9 (42)         | 29.7 (44)         | 32.2 (50)         | 12.1 (17)        |          |
|                                    | Sometimes                                                                | 22.3 (23)         | 35.0 (36)         | 34.3 (35)         | 8.4 (12)         |          |
|                                    | Rarely or never                                                          | 17.0 (45)         | 27.1 (74)         | 36.4 (88)         | 19.6 (49)        | 0.08     |
|                                    | Stay in shade on sunny days                                              |                   |                   |                   |                  |          |
|                                    | Always/most of the time or never in sun                                  | 24.9 (44)         | 33.1 (60)         | 26.6 (49)         | 15.4 (24)        |          |
|                                    | Sometimes                                                                | 16.4 (37)         | 25.5 (55)         | 43.4 (81)         | 14.7 (32)        |          |
|                                    | Rarely or never                                                          | 23.7 (32)         | 32.6 (42)         | 29.8 (43)         | 13.9 (22)        | 0.08     |
|                                    | Skin reaction to 30 minutes of sun exposure after prolonged non-exposure |                   |                   |                   |                  |          |
|                                    | Severe sunburn with blistering or peeling                                | 18.5 (20)         | 28.9 (26)         | 33.8 (29)         | 18.8 (14)        | 0.34     |
| Mild sunburn with some tanning     | 22.3 (48)                                                                | 30.3 (64)         | 38.0 (75)         | 9.5 (24)          |                  |          |
| Tanning without sunburn or nothing | 21.0 (45)                                                                | 30.0 (67)         | 30.2 (69)         | 18.8 (40)         |                  |          |

\*Test for categorical variables is Rao-Scott F adjusted Chi-Square

†n=2,031 and n=515 due to individuals who do not go out in the sun, respectively

— Not applicable

**Supplementary Table 4. Calibration Analysis of the Association of Daily Coffee Consumption with Malignant Melanoma and Melanoma *In Situ* Using a Subset of Participants (n=1,664) with Two 24-hour Dietary Recalls to Predict Mean Daily Consumption for the NIH-AARP Diet and Health Study Analytic Cohort (N=447,357)**

| FFQ coffee intake category     | Predicted mean coffee intake (cups/day)* | $\Delta$ Predicted mean coffee intake (cups/day) | $\beta_{1 \text{ cup}}$ from multivariable Cox regression model† | SE $_{\beta}$ | HR   | 95% CI      | P-trend‡ |
|--------------------------------|------------------------------------------|--------------------------------------------------|------------------------------------------------------------------|---------------|------|-------------|----------|
| <b>Malignant Melanoma</b>      |                                          |                                                  |                                                                  |               |      |             |          |
| 0 cups/day (Ref.)              | 0.045                                    | 0.000                                            | -0.030                                                           | 0.014         | Ref  | Ref         | 0.009    |
| ≤1 cup/day                     | 0.995                                    | 0.950                                            | -0.030                                                           | 0.014         | 0.97 | (0.95-1.00) |          |
| 2-3 cups/day                   | 2.535                                    | 2.490                                            | -0.030                                                           | 0.014         | 0.93 | (0.86-0.99) |          |
| ≥4 cups/day                    | 4.633                                    | 4.589                                            | -0.030                                                           | 0.014         | 0.87 | (0.76-0.99) |          |
| <b>Melanoma <i>In Situ</i></b> |                                          |                                                  |                                                                  |               |      |             |          |
| 0 cups/day (Ref.)              | 0.045                                    | 0.000                                            | 0.008                                                            | 0.018         | Ref  | Ref         | 0.35     |
| ≤1 cup/day                     | 0.995                                    | 0.950                                            | 0.008                                                            | 0.018         | 1.01 | (0.97-1.04) |          |
| 2-3 cups/day                   | 2.535                                    | 2.490                                            | 0.008                                                            | 0.018         | 1.02 | (0.94-1.11) |          |
| ≥4 cups/day                    | 4.633                                    | 4.589                                            | 0.008                                                            | 0.018         | 1.04 | (0.88-1.22) |          |

\*From multivariable linear regression model using mean coffee intake based on two days of 24-hour dietary recalls as the response variable and FFQ coffee intake categories as the main predictor (none (Ref.), <1 cup/month, 1-3 cups/month, 1-2 cups/week, 2-4 cups/week, 5-6 cups/week, 1 cup/day, 2-3 cups/day, 4-5 cups/day and 6+ cups/day) and adjusted for age (continuous), sex, cigarette smoking (never, former (defined by time since quitting (1-4 years, 5-9 years, ≥10 years) and smoking intensity (1-10 cigarettes/day, 11-20 cigarettes/day, 21-30 cigarettes/day, 31-40 cigarettes/day, 41-60 cigarettes/day, and ≥61 cigarettes/day) or current/quit < 1 year ago (defined by smoking intensity 1-10 cigarettes/day, 11-20 cigarettes/day, 21-30 cigarettes/day, 31-40 cigarettes/day, 41-60 cigarettes/day, and ≥61 cigarettes/day)), cigar/pipe smoking (ever user or nonuser), BMI (<25 kg/m<sup>2</sup>, 25 to <30 kg/m<sup>2</sup> or ≥30 kg/m<sup>2</sup>), education (less than high school, high school graduate, some college, or college graduate), average daily alcohol intake, physical activity (engaged in physical activity never or rarely, 1-3 times/month, 1-2 times per week, 3-4 times per week, or 5 or more times per week), family history of cancer (yes/no), and July erythematous UVR exposure (quartiles)

†From multivariable Cox regression model using predicted coffee intake as the main predictor (continuous) and adjusted for age (continuous), sex, cigarette smoking (never, former (defined by time since quitting (1-4 years, 5-9 years, ≥10 years) and smoking intensity (1-10 cigarettes/day, 11-20 cigarettes/day, 21-30 cigarettes/day, 31-40 cigarettes/day, 41-60 cigarettes/day, and ≥61 cigarettes/day) or current/quit < 1 year ago (defined by smoking intensity 1-10 cigarettes/day, 11-20 cigarettes/day, 21-30 cigarettes/day, 31-40 cigarettes/day, 41-60 cigarettes/day, and ≥61 cigarettes/day)), cigar/pipe smoking (ever user or nonuser), BMI (<25 kg/m<sup>2</sup>, 25 to <30 kg/m<sup>2</sup> or ≥30 kg/m<sup>2</sup>), education (less than high

school, high school graduate, some college, or college graduate), average daily alcohol intake, physical activity (engaged in physical activity never or rarely, 1-3 times/month, 1-2 times per week, 3-4 times per week, or 5 or more times per week), family history of cancer (yes/no), and July erythemal UVR exposure (quartiles)

‡From multivariable Cox regression model using predicted mean coffee intake for each of the four FFQ intake categories as the main predictor (continuous) and adjusted for age (continuous), sex, cigarette smoking (never, former (defined by time since quitting (1-4 years, 5-9 years,  $\geq 10$  years) and smoking intensity (1-10 cigarettes/day, 11-20 cigarettes/day, 21-30 cigarettes/day, 31-40 cigarettes/day, 41-60 cigarettes/day, and  $\geq 61$  cigarettes/day) or current/quit < 1 year ago (defined by smoking intensity 1-10 cigarettes/day, 11-20 cigarettes/day, 21-30 cigarettes/day, 31-40 cigarettes/day, 41-60 cigarettes/day, and  $\geq 61$  cigarettes/day)), cigar/pipe smoking (ever user or nonuser), BMI (<25 kg/m<sup>2</sup>, 25 to <30 kg/m<sup>2</sup> or  $\geq 30$  kg/m<sup>2</sup>), education (less than high school, high school graduate, some college, or college graduate), average daily alcohol intake, physical activity (engaged in physical activity never or rarely, 1-3 times/month, 1-2 times per week, 3-4 times per week, or 5 or more times per week), family history of cancer (yes/no), and July erythemal UVR exposure (quartiles)
